# Supplementary material
Source: PubMed Central journal article supplement (PMC5654396)
Supplement: PEDS_20170697SupplementaryData.pdf [file PEDS_20170697SupplementaryData.pdf]

# Supplemental Information

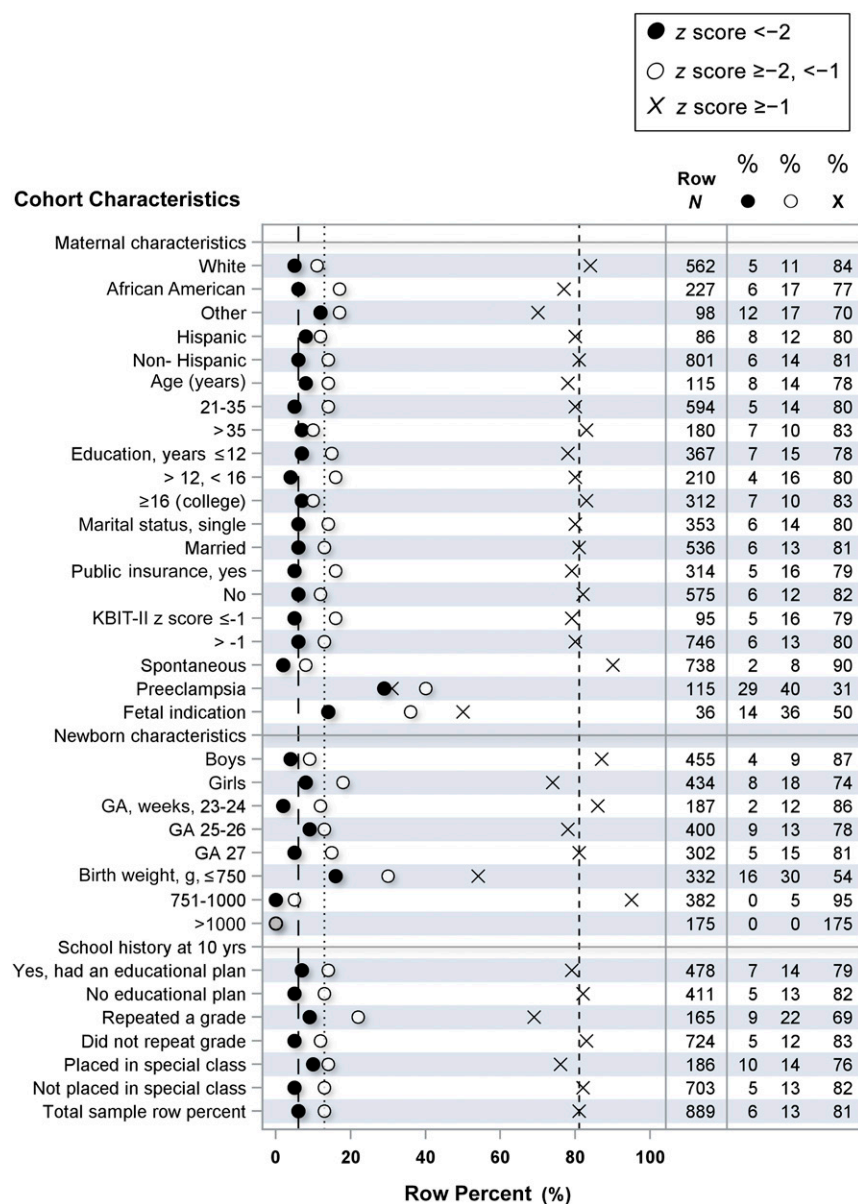

## SUPPLEMENTAL FIGURE 5

Row percents of children who did and did not have growth restriction defined by birth weight z score category ( $n = 889$ ). Max column  $N$ : ●,  $n = 53$ ; ○,  $n = 120$ ; X,  $n = 716$ . Vertical reference lines indicate a cohort prevalence (bottom line in table); gray circles indicate overlap; and maternal nonverbal intelligence was assessed with the Kaufman Brief Intelligence Test, Second Edition; and birth weight z score standard (Yudkin et al., 1987<sup>35</sup>). GA, gestational age; KBIT, Kaufman Brief Intelligence Test, Second Edition.

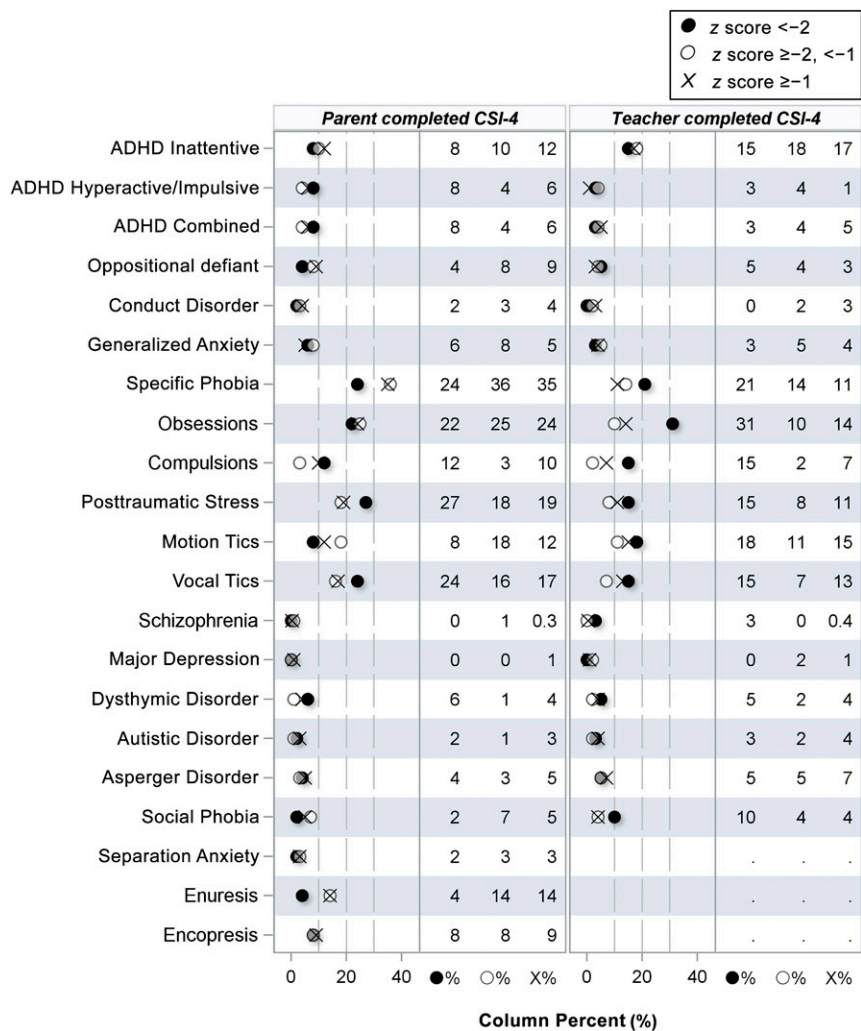

**SUPPLEMENTAL FIGURE 6**

Column percents of children who had each behavioral disorder listed on the left (screened in by a parent and separately by a teacher) by using the CSI-4 (based on the symptom count score) for each birth weight z score stratum. Max column *N* for parent assessments: ●, *n* = 51; ○, *n* = 120; X, *n* = 700. Max column *N* for teacher assessments: ●, *n* = 39; ○, *n* = 84; X, *n* = 517 (no information *n* = 12, 36, and 183, respectively). Gray circles indicate overlap; period indicates no information; and birth weight z score standard (Yudkin et al., 1987<sup>35</sup>). ADHD, attention-deficit/hyperactivity disorder.

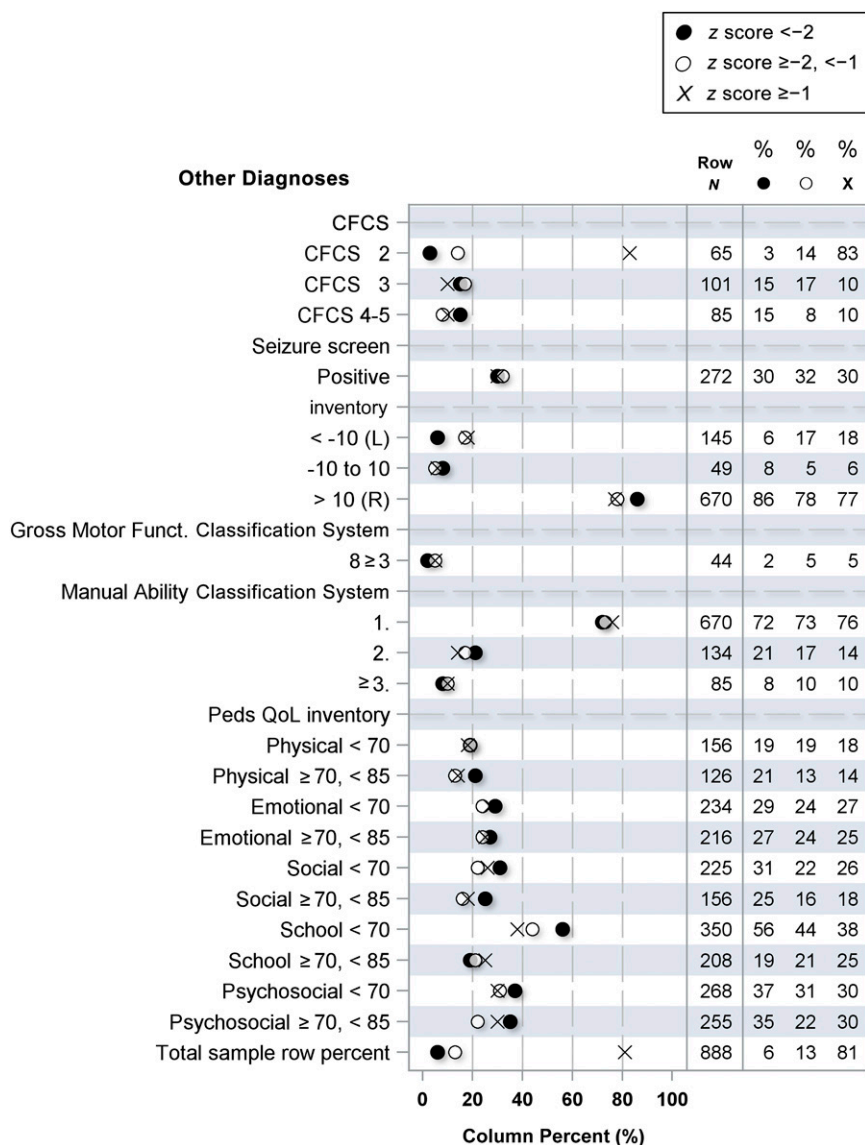

**SUPPLEMENTAL FIGURE 7**

Column percents of children who had each characteristic listed on the left in each birth weight z score stratum. Max column N: ●, n = 52 (no information n = 1); ○, n = 120; X, n = 716. Gray circles indicate overlap, and birth weight z score standard (Yudkin et al., 1987<sup>35</sup>). CFCS, communication function classification system; L, left; Peds QoL, pediatric quality of life; R, right.

**SUPPLEMENTAL TABLE 1** Row Percents of Cognitive Test Scores in Each Birth Weight Z Score Stratum

| Neurocognitive Assessments                    | Birth Weight         |  | Cognitive Assessment Z Score |          |         |       |
|-----------------------------------------------|----------------------|--|------------------------------|----------|---------|-------|
|                                               | Z Score <sup>a</sup> |  | ≤-2                          | >-2, ≤-1 | >-1, ≤1 | >1    |
|                                               |                      |  | 2.3%                         | 13.7%    | 68.2%   | 15.8% |
| <b>DAS-II</b>                                 |                      |  |                              |          |         |       |
| Verbal                                        | <-2                  |  | 24                           | 22       | 52      | 2     |
|                                               | ≥-2, <-1             |  | 22                           | 20       | 55      | 3     |
|                                               | ≥-1                  |  | 16                           | 18       | 57      | 9     |
| Word definitions                              | <-2                  |  | 16                           | 27       | 55      | 2     |
|                                               | ≥-2, <-1             |  | 18                           | 22       | 54      | 6     |
|                                               | ≥-1                  |  | 14                           | 17       | 60      | 9     |
| Verbal similarities                           | <-2                  |  | 20                           | 32       | 44      | 4     |
|                                               | ≥-2, <-1             |  | 22                           | 17       | 57      | 3     |
|                                               | ≥-1                  |  | 14                           | 19       | 60      | 7     |
| Nonverbal reasoning                           | <-2                  |  | 14                           | 35       | 47      | 4     |
|                                               | ≥-2, <-1             |  | 20                           | 25       | 52      | 3     |
|                                               | ≥-1                  |  | 14                           | 24       | 57      | 6     |
| Matrices                                      | <-2                  |  | 12                           | 29       | 56      | 4     |
|                                               | ≥-2, <-1             |  | 19                           | 21       | 55      | 5     |
|                                               | ≥-1                  |  | 14                           | 21       | 58      | 8     |
| Sequential and quantitative reasoning         | <-2                  |  | 8                            | 45       | 41      | 6     |
|                                               | ≥-2, <-1             |  | 16                           | 33       | 50      | 2     |
|                                               | ≥-1                  |  | 11                           | 28       | 53      | 8     |
| DAS-II IQ [(verbal and nonverbal reasoning)2] | <-2                  |  | 18                           | 28       | 52      | 2     |
|                                               | ≥-2, <-1             |  | 21                           | 22       | 53      | 3     |
|                                               | ≥-1                  |  | 14                           | 18       | 64      | 4     |
| <b>Language</b>                               |                      |  |                              |          |         |       |
| OWLS listening comprehension                  | <-2                  |  | 27                           | 23       | 46      | 4     |
|                                               | ≥-2, <-1             |  | 25                           | 23       | 50      | 3     |
|                                               | ≥-1                  |  | 17                           | 28       | 50      | 5     |
| OWLS oral expression                          | <-2                  |  | 22                           | 33       | 39      | 6     |
|                                               | ≥-2, <-1             |  | 38                           | 22       | 47      | 3     |
|                                               | ≥-1                  |  | 18                           | 22       | 54      | 7     |
| <b>WIAT</b>                                   |                      |  |                              |          |         |       |
| Word reading                                  | <-2                  |  | 14                           | 22       | 58      | 6     |
|                                               | ≥-2, <-1             |  | 18                           | 17       | 55      | 10    |
|                                               | ≥-1                  |  | 11                           | 17       | 58      | 14    |
| Pseudoword decoding                           | <-2                  |  | 22                           | 12       | 54      | 12    |
|                                               | ≥-2, <-1             |  | 18                           | 23       | 48      | 11    |
|                                               | ≥-1                  |  | 13                           | 16       | 61      | 9     |
| Numeric operations                            | <-2                  |  | 17                           | 35       | 46      | 2     |
|                                               | ≥-2, <-1             |  | 17                           | 28       | 52      | 3     |
|                                               | ≥-1                  |  | 16                           | 21       | 57      | 6     |
| Spelling                                      | <-2                  |  | 16                           | 20       | 59      | 6     |
|                                               | ≥-2, <-1             |  | 14                           | 19       | 54      | 11    |
|                                               | ≥-1                  |  | 10                           | 15       | 62      | 13    |

<sup>a</sup> External standard (Yudkin et al<sup>55</sup>).

**SUPPLEMENTAL TABLE 2** Row Percents of Executive Function Subtest Z Scores in Each Birth Weight Z Score Stratum

| Neurocognitive Assessments        | Birth Weight<br>Z Score <sup>a</sup> | Cognitive Assessment Z Score |          |         |       |
|-----------------------------------|--------------------------------------|------------------------------|----------|---------|-------|
|                                   |                                      | ≤-2                          | >-2, ≤-1 | >-1, ≤1 | >1    |
|                                   |                                      | 2.3%                         | 13.7%    | 68.2%   | 15.8% |
| <b>Executive function</b>         |                                      |                              |          |         |       |
| DAS-II working memory             | <-2                                  | 20                           | 30       | 48      | 2     |
|                                   | ≥-2, <-1                             | 23                           | 18       | 57      | 2     |
|                                   | ≥-1                                  | 17                           | 17       | 62      | 4     |
| DAS-II recall of digits backward  | <-2                                  | 20                           | 14       | 65      | 2     |
|                                   | ≥-2, <-1                             | 17                           | 16       | 67      | 0     |
|                                   | ≥-1                                  | 14                           | 14       | 69      | 3     |
| DAS-II recall of sequential order | <-2                                  | 26                           | 24       | 48      | 2     |
|                                   | ≥-2, <-1                             | 28                           | 10       | 61      | 1     |
|                                   | ≥-1                                  | 19                           | 13       | 64      | 4     |
| NEPSY-II auditory attention       | <-2                                  | 33                           | 21       | 46      | 0     |
|                                   | ≥-2, <-1                             | 27                           | 22       | 51      | 0     |
|                                   | ≥-1                                  | 21                           | 21       | 58      | 0     |
| NEPSY-II auditory response set    | <-2                                  | 37                           | 23       | 37      | 4     |
|                                   | ≥-2, <-1                             | 23                           | 27       | 47      | 3     |
|                                   | ≥-1                                  | 18                           | 28       | 49      | 4     |
| NEPSY-II inhibition inhibition    | <-2                                  | 43                           | 22       | 33      | 2     |
|                                   | ≥-2, <-1                             | 37                           | 21       | 41      | 1     |
|                                   | ≥-1                                  | 32                           | 24       | 40      | 4     |
| NEPSY-II inhibition switching     | <-2                                  | 39                           | 29       | 31      | 0     |
|                                   | ≥-2, <-1                             | 33                           | 27       | 33      | 7     |
|                                   | ≥-1                                  | 26                           | 29       | 38      | 7     |
| NEPSY-II animal sorting           | <-2                                  | 33                           | 27       | 38      | 2     |
|                                   | ≥-2, <-1                             | 28                           | 37       | 31      | 3     |
|                                   | ≥-1                                  | 28                           | 30       | 39      | 3     |
| <b>Processing speed</b>           |                                      |                              |          |         |       |
| NEPSY-II inhibition naming        | <-2                                  | 43                           | 16       | 33      | 8     |
|                                   | ≥-2, <-1                             | 39                           | 17       | 38      | 6     |
|                                   | ≥-1                                  | 29                           | 21       | 43      | 8     |
| <b>Visual perception</b>          |                                      |                              |          |         |       |
| NEPSY-II arrows                   | <-2                                  | 44                           | 13       | 40      | 2     |
|                                   | ≥-2, <-1                             | 30                           | 28       | 41      | 2     |
|                                   | ≥-1                                  | 24                           | 22       | 47      | 6     |
| NEPSY-II geometric puzzles        | <-2                                  | 19                           | 29       | 50      | 2     |
|                                   | ≥-2, <-1                             | 19                           | 20       | 58      | 3     |
|                                   | ≥-1                                  | 16                           | 22       | 58      | 4     |
| <b>Visual motor function</b>      |                                      |                              |          |         |       |
| NEPSY-II visuomotor precision     | <-2                                  | 27                           | 35       | 31      | 8     |
|                                   | ≥-2, <-1                             | 27                           | 30       | 38      | 5     |
|                                   | ≥-1                                  | 19                           | 36       | 38      | 7     |
| NEPSY-II fingertip tap sequence   | <-2                                  | 10                           | 14       | 69      | 8     |
|                                   | ≥-2, <-1                             | 15                           | 10       | 61      | 14    |
|                                   | ≥-1                                  | 12                           | 14       | 61      | 13    |

<sup>a</sup> External standard (Yudkin et al<sup>35</sup>).

**SUPPLEMENTAL TABLE 3** Column Percent of Children Who Screened Positive on the Total SRS, SCQ, and ASD (Based on a Positive ADOS-2 Assessment) for Each Birth Weight Z Score Stratum

| Assessment                          | Score or Response | Birth Weight Z Score <sup>a</sup> |          |     | Row      |
|-------------------------------------|-------------------|-----------------------------------|----------|-----|----------|
|                                     |                   | ≤-2                               | >-2, ≤-1 | >-1 | <i>N</i> |
| SRS <sup>b</sup>                    |                   |                                   |          |     |          |
| Total                               | ≥76               | 18                                | 12       | 12  | 109      |
|                                     | 60-75             | 24                                | 21       | 18  | 162      |
| Social awareness                    | ≥76               | 12                                | 4        | 4   | 40       |
|                                     | 60-75             | 24                                | 19       | 18  | 161      |
| Social cognition                    | ≥76               | 16                                | 10       | 10  | 93       |
|                                     | 60-75             | 29                                | 25       | 18  | 168      |
| Social communication                | ≥76               | 14                                | 11       | 9   | 85       |
|                                     | 60-75             | 24                                | 18       | 19  | 163      |
| Social motivation                   | ≥76               | 12                                | 7        | 7   | 65       |
|                                     | 60-75             | 27                                | 28       | 23  | 206      |
| Autistic mannerisms                 | ≥76               | 22                                | 14       | 15  | 132      |
|                                     | 60-75             | 16                                | 25       | 17  | 156      |
| SCQ communication items             |                   |                                   |          |     |          |
| 2. To and from conversation         | No                | 4                                 | 3        | 4   | 35       |
| 3. Odd phrases, near repeats        | Yes               | 38                                | 30       | 27  | 239      |
| 4. Socially inappropriate questions | Yes               | 36                                | 21       | 22  | 191      |
| 5. Mixes up pronouns                | Yes               | 26                                | 22       | 24  | 205      |
| 6. Use made-up words                | Yes               | 32                                | 15       | 16  | 142      |
| 20. Talk just to be friendly        | No                | 17                                | 17       | 13  | 119      |
| 21. Spontaneously copy you          | No                | 21                                | 30       | 27  | 238      |
| 22. Spontaneously point             | No                | 23                                | 23       | 18  | 164      |
| 23. Other gestures to indicate      | No                | 37                                | 41       | 38  | 338      |
| 24. Nod head to mean yes            | No                | 8                                 | 11       | 10  | 85       |
| 25. Shake head to mean no           | No                | 6                                 | 8        | 9   | 77       |
| 34. Spontaneously join social games | No                | 19                                | 21       | 15  | 142      |
| 35. Play make-believe games         | No                | 17                                | 23       | 16  | 148      |
| SCQ total                           | Positive          | 21                                | 14       | 14  | 129      |
| ASD                                 | Positive          | 16                                | 5        | 7   | 61       |
| Maximum column <i>N</i>             | —                 | 52                                | 120      | 703 | 875      |

—, not applicable.

<sup>a</sup> External standard (Yudkin et al<sup>35</sup>).

<sup>b</sup> SRS was normal at <60, mild at 60-75, and severe at ≥76.

**SUPPLEMENTAL TABLE 4** Column Percents of CCC-2 Z Score Categories in Each Birth Weight Z Score Stratum

| CCC-2 Component         | Z Score         | Birth Weight Z Score <sup>a</sup> |                 |        | Row      |
|-------------------------|-----------------|-----------------------------------|-----------------|--------|----------|
|                         |                 | $\leq -2$                         | $> -2, \leq -1$ | $> -1$ | <i>N</i> |
| Speech                  | $\leq -2$       | 12                                | 14              | 9      | 84       |
|                         | $> -2, \leq -1$ | 14                                | 12              | 13     | 109      |
| Syntax                  | $\leq -2$       | 14                                | 9               | 9      | 82       |
|                         | $> -2, \leq -1$ | 14                                | 19              | 14     | 128      |
| Semantics               | $\leq -2$       | 14                                | 6               | 8      | 67       |
|                         | $> -2, \leq -1$ | 20                                | 17              | 14     | 126      |
| Coherence               | $\leq -2$       | 14                                | 8               | 9      | 81       |
|                         | $> -2, \leq -1$ | 24                                | 16              | 14     | 124      |
| Initiation              | $\leq -2$       | 8                                 | 6               | 7      | 62       |
|                         | $> -2, \leq -1$ | 18                                | 15              | 15     | 127      |
| Scripted language       | $\leq -2$       | 6                                 | 9               | 8      | 68       |
|                         | $> -2, \leq -1$ | 18                                | 15              | 11     | 102      |
| Context                 | $\leq -2$       | 12                                | 6               | 8      | 67       |
|                         | $> -2, \leq -1$ | 20                                | 18              | 13     | 120      |
| Nonverbal communication | $\leq -2$       | 14                                | 8               | 10     | 87       |
|                         | $> -2, \leq -1$ | 20                                | 13              | 11     | 99       |
| Social relations        | $\leq -2$       | 6                                 | 6               | 7      | 61       |
|                         | $> -2, \leq -1$ | 20                                | 10              | 12     | 106      |
| Interests               | $\leq -2$       | 8                                 | 4               | 6      | 49       |
|                         | $> -2, \leq -1$ | 28                                | 16              | 15     | 132      |
| Composite score (GCC)   | <64 (bad)       | 6                                 | 4               | 3      | 32       |
| Maximum column <i>N</i> | —               | 50                                | 116             | 688    | 854      |

GCC, general communication composite; —, not applicable.

<sup>a</sup> External standard (Yudkin et al<sup>35</sup>).
